# Supplementary material for: A single-site hydroxyapatite-bound zinc catalyst for highly efficient chemical fixation of carbon dioxide with epoxides
Source: Royal Society of Chemistry journal article supplement (doi:10.1039/b502636a), 2005-01-01
Supplement: b502636a.pdf [file b502636a.pdf]

## Electronic Supplementary Information

# A single-site hydroxyapatite-bound zinc catalyst for highly efficient chemical fixation of carbon dioxide with epoxides

**Kohsuke Mori, Yohei Mitani, Takayoshi Hara, Tomoo Mizugaki, Kohki Ebitani, and Kiyotomi Kaneda\***

*Department of Materials Engineering Science,*

*Graduate School of Engineering Science, Osaka University,*

*1-3 Machikaneyama, Toyonaka, Osaka 560-8531, Japan.*

*Phone and Fax: +81-6-6850-6260, E-mail: kaneda@cheng.es.osaka-u.ac.jp*

**General:**  $^1\text{H-NMR}$  spectra were obtained on JNM-AL400 spectrometers at 400 MHz in  $\text{CDCl}_3$  with TMS as an internal standard. Analytical GLC was performed by Shimadzu GC-8A PF with flame ionization detector equipped with Silicon UC W-98, KOCL 3000T, Silicon SE-30, and OV-17 columns. XPS were recorded on Shimadzu ESCA-KM using  $\text{MgK}\alpha$  radiation.  $(\text{NH}_4)_2\text{HPO}_4$ ,  $\text{Ca}(\text{NO}_3)_2 \cdot 4\text{H}_2\text{O}$ , and  $\text{Zn}(\text{NO}_3)_2 \cdot 6\text{H}_2\text{O}$  were purchased from Wako Pure Chemical Ind., Ltd and used without further purification. Solvents and all commercially available chemicals were purified by standard procedures used before. *Trans*-1-deuterio-1,2-hexene oxide was synthesized according to the literature procedures (see: Ref. 3c).

**Synthesis of hydroxyapatite-bound Zn complex (ZnHAP):**  $(\text{NH}_4)_2\text{HPO}_4$  (40.0 mmol) was dissolved in deionized water (150 mL) and pH was adjusted to 11 with an aqueous  $\text{NH}_3$  solution. To a solution of  $\text{Ca}(\text{NO}_3)_2 \cdot 4\text{H}_2\text{O}$  (66.7 mmol) in deionized water (120 mL) adjusted to pH 11 with an aqueous  $\text{NH}_3$  solution was added drop-wise over 30 min into the above solution with vigorous stirring at room temperature, and then the obtained milky solution was heated at  $90^\circ\text{C}$  for 10 min. The precipitate was filtered, washed with deionized water, and dried at  $110^\circ\text{C}$ , giving stoichiometric hydroxyapatite,  $\text{Ca}_{10}(\text{PO}_4)_6(\text{OH})_2$  (HAP). 2.0 g of the HAP was stirred at room temperature for 24 h in a 100 mL of aqueous solution of  $\text{Zn}(\text{NO}_3)_2 \cdot 6\text{H}_2\text{O}$  ( $1.0 \times 10^{-2}$  M). The obtained slurry was filtered, washed with deionized water and dried at  $110^\circ\text{C}$  overnight, yielded the ZnHAP (Zn content:  $0.3 \text{ mmol}\cdot\text{g}^{-1}$ ) as a white powder.

**A typical example for the coupling of epoxide and CO<sub>2</sub>:** Into a 150 ml of stainless autoclave were successively placed the ZnHAP (0.01 g, Zn<sup>2+</sup>: 0.003 mmol), DMAP (0.02 mmol), and epichlorohydrin (100 mmol), and then charged with CO<sub>2</sub> (10 atm). The reaction mixture was stirred at 100°C for 24 h. The reactor was cooled to room temperature and the reaction mixture was subjected to GC analysis after removal of catalyst to give 4-(chloromethyl)-1,3-dioxolan-2-one in 90 % yield.

**A typical example for the coupling of epoxide and CO<sub>2</sub> under atmospheric pressure conditions:** Into a reaction vessel equipped with a reflux condenser were successively placed the ZnHAP (0.01 g, Zn<sup>2+</sup>: 0.003 mmol), DMAP (0.02 mmol), and epichlorohydrin (100 mmol). The reaction mixture was stirred at 100°C for 24 h under 1 atm of CO<sub>2</sub> balloon conditions. The reactor was cooled to room temperature and the reaction mixture was subjected to GC analysis after removal of catalyst 4-(chloromethyl)-1,3-dioxolan-2-one in 86 % yield.

**An example for the coupling of enantiomerically pure benzyl glycidyl ethers with CO<sub>2</sub>:** Into a 100 ml of stainless autoclave were successively placed the ZnHAP (0.1 g, Zn<sup>2+</sup>: 0.03 mmol), DMAP (0.2 mmol), and (*R*)- or (*S*)-benzyl glycidyl ethers (15 mmol), and then charged with CO<sub>2</sub> (5 atm). The reaction mixture was stirred at 100°C for 24 h. The reactor was cooled to room temperature and the reaction mixture was subjected to HPLC analysis after removal of catalyst. The enantiomeric excess of (*R*)- and (*S*)-4-(benzyloxymethyl)-1,3-dioxolan-2-one were determined by chiral HPLC (Daisel Chiracel OF, eluent: *n*-hexane/ethanol (8:2 v/v), flow rate: 1.0 mL/min, 254 nm, t<sub>R</sub> of (*R*) = 20.9 min, t<sub>R</sub> of (*S*) = 18.6 min).

**The coupling reaction of *trans*-1-deuterio-1,2-hexene oxide with CO<sub>2</sub>:** Into a 15 ml of stainless autoclave were successively placed the ZnHAP (0.005 g, Zn<sup>2+</sup>: 0.0015 mmol), DMAP (0.01 mmol), and *trans*-1-deuterio-1,2-hexene oxide (5 mmol), and then charged with CO<sub>2</sub> (10 atm). The reaction mixture was stirred at 130°C for 24 h. The reactor was cooled to room temperature and the reaction mixture was subjected to <sup>1</sup>H NMR analysis after removal of catalyst. The total yield of the corresponding 1,2-hexene carbonate was 90 % and the *trans/cis* ratio was 9:2. <sup>1</sup>H NMR (400 MHz, TMS, CDCl<sub>3</sub>), *trans*-1-deuterio-1,2-hexene carbonate; δ 0.93 (3H, t, *J*=7.2 Hz, CH<sub>3</sub>), 1.34-1.46 (4H, m, -CH<sub>2</sub>CH<sub>2</sub>-), 1.68-1.82 (2H, m, CH<sub>2</sub>), 4.06 (1H, d, *J*=6.9 Hz, CDH), 4.72 (1H, m, CH), *cis*-1-deuterio-1,2-hexene carbonate; δ 0.93 (3H, t, *J*=7.2 Hz, CH<sub>3</sub>), 1.34-1.46 (4H, m, -CH<sub>2</sub>CH<sub>2</sub>-), 1.68-1.82 (2H, m, CH<sub>2</sub>), 4.67 (1H, dt, *J*=7.8, 1.2 Hz, CDH), 4.72 (1H, m, CH).

**Characterization by Zn K-edge X-ray absorption fine structure (XAFS):** X-ray absorption spectra were recorded using at the beam line 7C station with attached Si (111) monochromator at PF, KEK, Tsukuba, Japan (Proposal number : 2002G102). Details of data analysis are referred to the reported procedure (See: Tanaka, T.; Yamashita, H.; Tsuchitani, R.; Funabiki, T.; Yoshida, S. *J. Chem. Soc., Faraday Trans.* 1988, **84**, 2987). The Zn K-edge XANES and the inverse Fourier-transforms of EXAFS experimental data are shown in Figure 1S. The results of curve-fitting analysis for the ZnHAP are summarized in Table 1S.

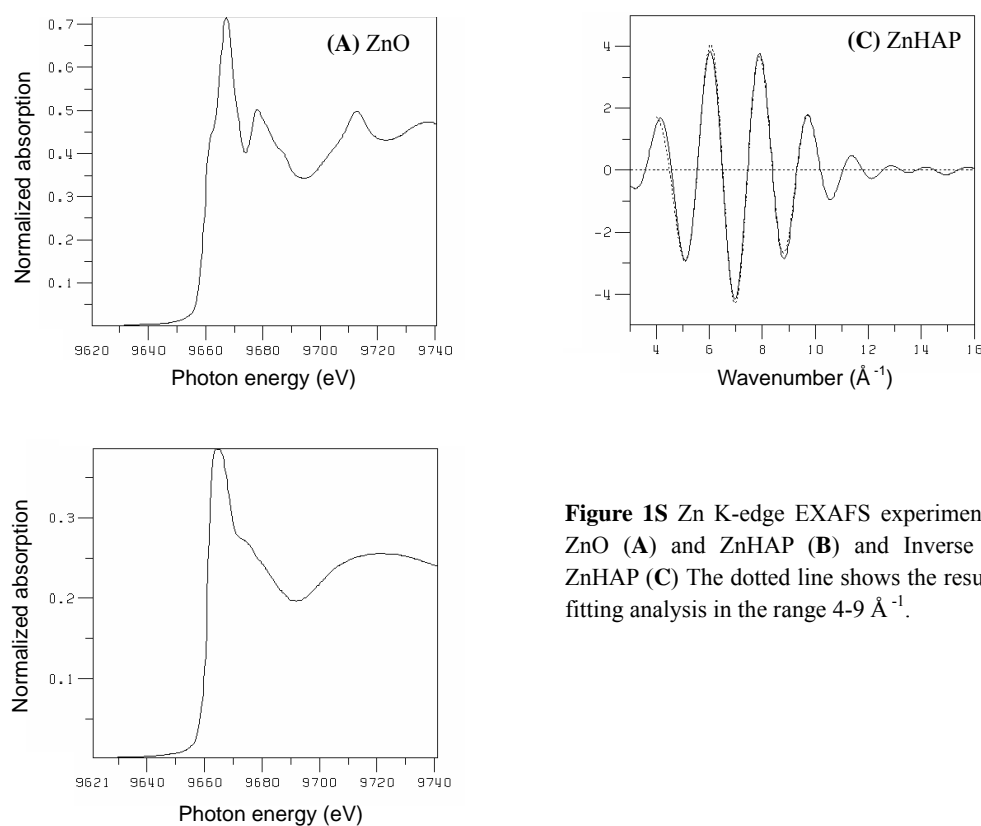

**Figure 1S** Zn K-edge EXAFS experimental data for ZnO (A) and ZnHAP (B) and Inverse FT of the ZnHAP (C) The dotted line shows the results of curve fitting analysis in the range 4-9 Å<sup>-1</sup>.

**Table 1S** Results of Curve-fitting Analysis for ZnHAP<sup>a</sup>

| shell   | C.N. <sup>b</sup> | R <sup>c</sup> / Å | σ <sup>d</sup> / Å <sup>2</sup> |
|---------|-------------------|--------------------|---------------------------------|
| Zn-O(1) | 4.0               | 1.88               | 0.0019                          |
| Zn-O(2) | 3.0               | 2.28               | 0.0025                          |

<sup>a</sup> The region of 1.1-2.2 Å was inversely Fourier transformed.

<sup>b</sup> Coordination number. <sup>c</sup> Interatomic distance. <sup>d</sup> Difference between Debye-Waller factor of ZnHAP and that of the reference sample.
